# Supplementary material
Source: Springer Nature journal article supplement (https://www.springermedizin.de/resource/supplementary/13024_2010_171_MOESM2_ESM.pdf/9643576)

### Aβ production from APP-RFP constructs

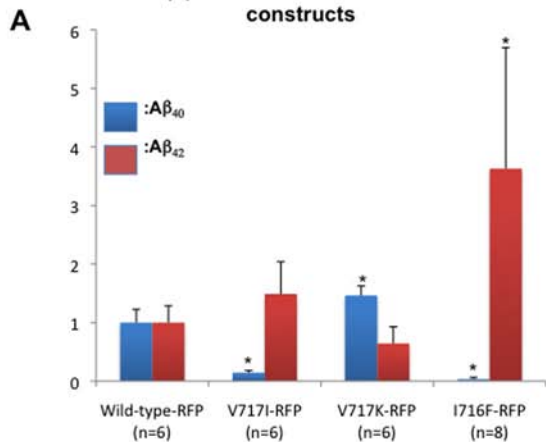

### APP/APL2 dKO Cells

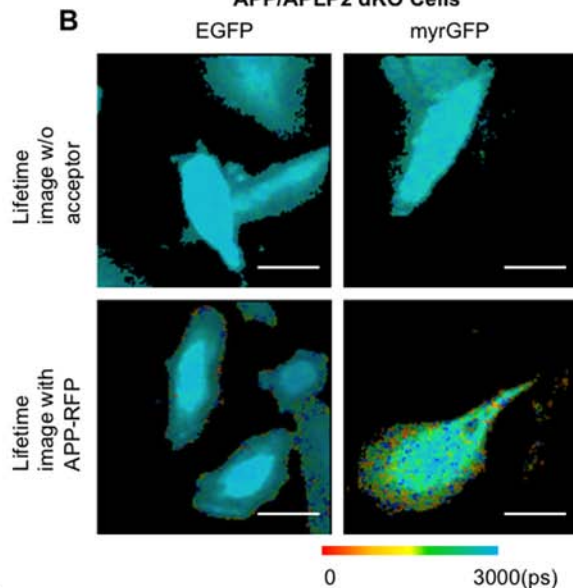

### APP/APL2 dKO Cells

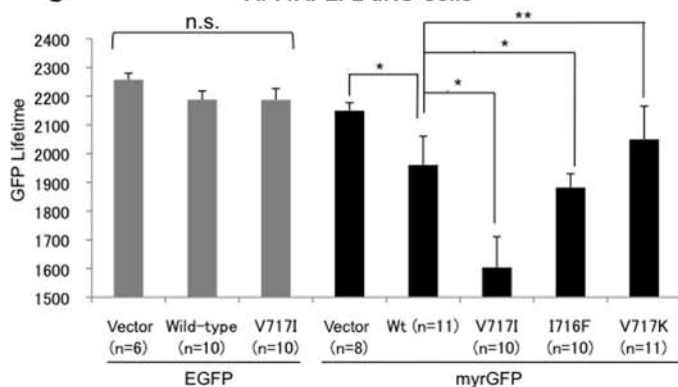

### CHO Cells

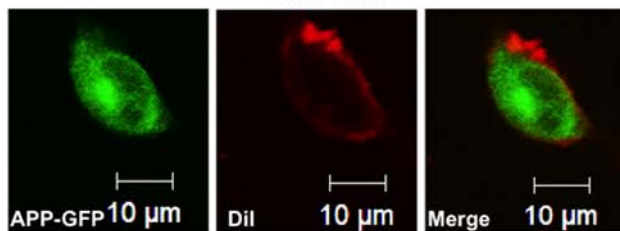

### CHO Cells

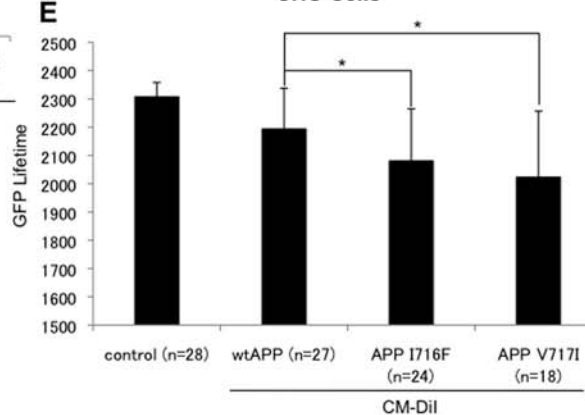

Supplement: MOESM2 [file 9643576]
